# Supplementary material for: Exploring the potency of 6-bromo-3-methylquinoline analogues as prostaglandin F2α inhibitors
Source: publisher site journal article supplement (doi:10.1515/znc-2025-0116), 2025-09-17
Supplement: Supplementary file 1 [file j_znc-2025-0116_suppl_001.docx]

**Supplementary Data**

**Table S1.** Molecules with their SMILES.

| **Compound** | **SMILES** |
| --- | --- |
| P3 | CC[C@H]1CCCN(C1)c1nc2ccc(Br)cc2c(C(=O)NC[C@H](CCC(O)=O)c2ccccc2C(F)(F)F)c1C |
| P8 | Cc1c(nc2ccc(Br)cc2c1C(=O)NC[C@H](CCC(O)=O)c1ccccc1OC(F)(F)F)N1CCCCC1 |
| P9 | CC[C@@H]1CCCN(C1)c1nc2ccc(Br)cc2c(C(=O)NC[C@@H](CCC(O)=O)c2ccccc2Cl)c1C |
| P10 | CCC1CCCN(C1)c1nc2ccc(Br)cc2c(C(=O)NCC(CCC(O)=O)c2ccccc2Cl)c1C |
| P11 | Cc1c(nc2ccc(Br)cc2c1C(=O)NC[C@@H](CCC(O)=O)c1ccccc1OC(F)(F)F)N1CCCCC1 |
| P13 | Cc1c(nc2ccc(Br)cc2c1C(=O)NC[C@H](CCC(O)=O)c1ccccc1OC(F)(F)F)N1CCCCCC1 |
| P18 | Cc1c(nc2ccc(Br)cc2c1C(=O)NC[C@H](CCC(O)=O)c1c(F)cccc1C(F)(F)F)N1CCCCC1 |
| P20 | COc1ccccc1[C@@H](CCC(O)=O)CNC(=O)c1c(C)c(nc2ccc(Br)cc12)N1CCCCCC1 |
| P21 | COc1ccccc1[C@@H](CCC(O)=O)CNC(=O)c1c(C)c(nc2ccc(Br)cc12)N1CCCCC1 |
| P22 | CCC1CCCN(C1)c1nc2ccc(Br)cc2c(C(=O)NCC(CCC(O)=O)c2ccccc2OC(F)(F)F)c1C |
| P23 | Cc1c(nc2ccc(Br)cc2c1C(=O)NC[C@H](CCC(O)=O)c1c(Cl)ccc(F)c1F)N1CCCCC1 |
| P24 | Cc1c(nc2ccc(Br)cc2c1C(=O)NC[C@H](CCC(O)=O)c1c(F)cccc1OC(F)F)N1CCCCC1 |
| P26 | C[C@H]1CCCN(C1)c1nc2ccc(Br)cc2c(C(=O)NC[C@@H](CCC(O)=O)c2ccccc2C(F)(F)F)c1C |
| P27 | Cc1c(nc2ccc(Br)cc2c1C(=O)NCC(CCC(O)=O)c1ccccc1OC(F)(F)F)N1CCCCC1 |
| P28 | Cc1c(nc2ccc(Br)cc2c1C(=O)NC[C@H](CCC(O)=O)c1ccccc1OC(F)(F)F)N1CCC[C@@H](F)C1 |
| P29 | CC1CCCN(C1)c1nc2ccc(Br)cc2c(C(=O)NCC(CCC(O)=O)c2c(F)ccc(F)c2Cl)c1C |
| P30 | CC[C@@H]1CCCN(C1)c1nc2ccc(Br)cc2c(C(=O)NC[C@H](CCC(O)=O)c2cc(F)ccc2F)c1C |
| P34 | Cc1c(nc2ccc(Br)cc2c1C(=O)NCC(CCC(O)=O)c1c(Cl)ccc(F)c1F)N1CCCCC1 |
| P37 | CC1CCCN(C1)c1nc2ccc(Br)cc2c(C(=O)NCC(CCC(O)=O)c2ccccc2OC(F)(F)F)c1C |
| P38 | Cc1c(nc2ccc(Br)cc2c1C(=O)NC[C@@H](CCC(O)=O)c1ccccc1OC(F)(F)F)N1CCCC1 |
| P39 | COc1ccccc1[C@@H](CCC(O)=O)CNC(=O)c1c(C)c(nc2ccc(Br)cc12)N1CCCC(F)(F)C1 |
| P40 | Cc1c(nc2ccc(Br)cc2c1C(=O)NCC(CCC(O)=O)c1c(F)ccc(F)c1Cl)N1CCCC(F)C1 |
| P43 | CC[C@@H]1CCCN(C1)c1nc2ccc(Br)cc2c(C(=O)NC[C@@H](CCC(O)=O)c2ccccc2C(F)(F)F)c1C |
| P48 | Cc1c(nc2ccc(Br)cc2c1C(=O)NC[C@H](CCC(O)=O)c1ccccc1C(F)(F)F)N1CCCCC1 |
| P49 | Cc1c(nc2ccc(Br)cc2c1C(=O)NC[C@@H](CCC(O)=O)c1c(F)cccc1C(F)(F)F)N1CCCC1 |
| P50 | Cc1c(nc2ccc(Br)cc2c1C(=O)NC[C@@H](CCC(O)=O)c1c(F)ccc(F)c1Cl)N1CCCC1 |
| P51 | Cc1c(nc2ccc(Br)cc2c1C(=O)NCC(CCC(O)=O)c1c(F)cccc1OC(F)F)N1CCCCC1 |
| P53 | Cc1c(nc2ccc(Br)cc2c1C(=O)NC[C@H](CCC(O)=O)c1ccccc1C(F)(F)F)N1CCCCC1 |
| P54 | Cc1c(nc2ccc(Br)cc2c1C(=O)NCC(CCC(O)=O)c1ccccc1Cl)N1CCCC(F)(F)C1 |
| P62 | CC[C@H]1CCCN(C1)c1nc2ccc(Br)cc2c(C(=O)NC[C@H](CCC(O)=O)c2cc(F)ccc2F)c1C |
| P63 | Cc1c(nc2ccc(Br)cc2c1C(=O)NC[C@@H](CCC(O)=O)c1ccccc1C(F)(F)F)N1CCCCC1 |
| P67 | Cc1c(nc2ccc(Br)cc2c1C(=O)NC[C@@H](CCC(O)=O)c1ccccc1OC(F)(F)F)N1CCCCCC1 |
| P71 | Cc1c(nc2ccc(Br)cc2c1C(=O)NC[C@H](CCC(O)=O)c1ccccc1Cl)N1CCCCCC1 |
| P75 | CC1CCCN(C1)c1nc2ccc(Br)cc2c(C(=O)NCC(CCC(O)=O)c2cc(F)ccc2Cl)c1C |
| P76 | Cc1c(nc2ccc(Br)cc2c1C(=O)NC[C@H](CCC(O)=O)c1cccc(F)c1Cl)N1CCCCC1 |
| P79 | Cc1ccc(F)cc1[C@@H](CCC(O)=O)CNC(=O)c1c(C)c(nc2ccc(Br)cc12)N1CCCCC1 |
| P82 | CC1CCCN(C1)c1nc2ccc(Br)cc2c(C(=O)NCC(CCC(O)=O)c2ccccc2Cl)c1C |
| P83 | Cc1c(nc2ccc(Br)cc2c1C(=O)NC[C@@H](CCC(O)=O)c1ccccc1Cl)N1CCCCC1 |
| P84 | Cc1c(nc2ccc(Br)cc2c1C(=O)NC[C@@H](CCC(O)=O)c1ccccc1OC(F)(F)F)N1CCCC(F)(F)C1 |
| P86 | CC1CCCN(C1)c1nc2ccc(Br)cc2c(C(=O)NCC(CCC(O)=O)c2ccccc2C(F)(F)F)c1C |
| P87 | Cc1c(nc2ccc(Br)cc2c1C(=O)NCC(CCC(O)=O)c1c(F)cccc1C(F)(F)F)N1CCCCC1 |
| P88 | Cc1c(nc2ccc(Br)cc2c1C(=O)NC[C@H](CCC([O-])=O)c1ccccc1Cl)N1CCCC1 |
| P89 | Cc1c(nc2ccc(Br)cc2c1C(=O)NC[C@H](CCC(O)=O)c1ccccc1Cl)N1CCCCC1 |
| P90 | Cc1c(nc2ccc(Br)cc2c1C(=O)NC[C@H](CCC(O)=O)c1ccccc1Cl)N1CCCCCC1 |
| P92 | Cc1c(nc2ccc(Br)cc2c1C(=O)NC[C@H](CCC(O)=O)c1ccccc1Cl)N1CCCCC1 |
| P94 | Cc1c(nc2ccc(Br)cc2c1C(=O)NCC(CCC(O)=O)c1cccc(F)c1Cl)N1CCCCC1 |
| P95 | Cc1c(nc2ccc(Br)cc2c1C(=O)NC[C@@H](CCC(O)=O)c1ccccc1Cl)N1CCC[C@@H](F)C1 |
| P98 | C[C@H]1CCCN1c1nc2ccc(Br)cc2c(C(=O)NC[C@@H](CCC(O)=O)c2ccccc2Cl)c1C |
| P99 | Cc1c(nc2ccc(Br)cc2c1C(=O)NCC(CCC(O)=O)c1ccccc1C(F)(F)F)N1CCCCC1 |
| P100 | Cc1c(nc2ccc(Br)cc2c1C(=O)NC[C@H](CCC(O)=O)c1ccccc1Cl)N1CC[C@@H](F)C1 |
| P101 | Cc1c(nc2ccc(Br)cc2c1C(=O)NC[C@@H](CCC(O)=O)c1cc(F)ccc1Cl)N1CCCCC1 |
| P102 | Cc1c(nc2ccc(Br)cc2c1C(=O)NC[C@@H](CCC(O)=O)c1ccccc1Cl)N1CCCC1 |
| P103 | Cc1c(nc2ccc(Br)cc2c1C(=O)NCC(CCC(O)=O)c1ccccc1Cl)N1CCCCC1 |
| P104 | CCC1CCCN(C1)c1nc2ccc(Br)cc2c(C(=O)NCC(CCC(O)=O)c2c(Cl)ccc(Cl)c2Cl)c1C |
| P106 | C[C@H]1CCCN(C1)c1nc2ccc(Br)cc2c(C(=O)NC[C@H](CCC(O)=O)c2ccccc2OC(F)(F)F)c1C |
| P107 | Cc1c(nc2ccc(Br)cc2c1C(=O)NC[C@@H](CCC(O)=O)c1ccccc1Cl)N1CCCC(F)(F)C1 |
| P108 | Cc1ccccc1C(CCC(O)=O)CNC(=O)c1c(C)c(nc2ccc(Br)cc12)N1CCCCC1 |
| P109 | Cc1c(nc2ccc(Br)cc2c1C(=O)NC[C@H](CCC(O)=O)c1ccccc1Cl)N1CCCC1 |
| P111 | CC[C@H]1CCCN(C1)c1nc2ccc(Br)cc2c(C(=O)NC[C@@H](CCC(O)=O)c2ccccc2Cl)c1C |
| P112 | CC1CCCN1c1nc2ccc(Br)cc2c(C(=O)NCC(CCC(O)=O)c2ccccc2Cl)c1C |
| P113 | Cc1c(nc2ccc(Br)cc2c1C(=O)NC[C@@H](CCC(O)=O)c1c(Cl)ccc(Cl)c1Cl)N1CCCC1 |
| P114 | Cc1c(nc2ccc(Br)cc2c1C(=O)NC[C@H](CCC(O)=O)c1cc(F)ccc1Cl)N1CCCCC1 |
| P116 | Cc1c(nc2ccc(Br)cc2c1C(=O)NC[C@H](CCC(O)=O)c1c(Cl)ccc(Cl)c1Cl)N1CCC[C@H](F)C1 |
| P117 | Cc1c(nc2ccc(Br)cc2c1C(=O)NC[C@H](CCC(O)=O)c1cc(F)ccc1F)N1CCCCC1 |
| P118 | Cc1c(nc2ccc(Br)cc2c1C(=O)NC[C@H](CCC(O)=O)c1ccccc1C(F)(F)F)N1CCCC(F)(F)C1 |
| P119 | Cc1c(nc2ccc(Br)cc2c1C(=O)NC[C@H](CCC(O)=O)c1ccccc1Cl)N1CCC[C@@H](F)C1 |
| P120 | Cc1c(nc2ccc(Br)cc2c1C(=O)NC[C@H](CCC(O)=O)c1ccccc1Cl)N1CCC=CC1 |
| P122 | Cc1c(nc2ccc(Br)cc2c1C(=O)NCC(CCC(O)=O)c1c(F)cccc1C(F)(F)F)N1CCCC(F)C1 |
| P123 | Cc1c(nc2ccc(Br)cc2c1C(=O)NC[C@@H](CCC(O)=O)c1cccc(F)c1Cl)N1CCCCC1 |
| P124 | Cc1c(nc2ccc(Br)cc2c1C(=O)NC[C@@H](CCC(O)=O)c1c(F)cccc1F)N1CCCC(F)(F)C1 |
| P125 | Cc1c(nc2ccc(Br)cc2c1C(=O)NC[C@@H](CCC(O)=O)c1c(F)cccc1F)N1CCCC1 |
| P128 | Cc1c(nc2ccc(Br)cc2c1C(=O)NCC(CCC(O)=O)c1c(F)cccc1C(F)(F)F)N1CCCC(F)(F)C1 |
| P130 | Cc1c(nc2ccc(Br)cc2c1C(=O)NC[C@@H](CCC(O)=O)c1ccccc1Cl)N1CCCC1 |
| P131 | Cc1c(nc2ccc(Br)cc2c1C(=O)NC[C@@H](CCC(O)=O)c1ccccc1OC(F)(F)F)N1CCCC1 |
| P133 | Cc1c(nc2ccc(Br)cc2c1C(=O)NC[C@@H](CCC(O)=O)c1ccccc1C(F)(F)F)N1CCCCC1 |
| P135 | Cc1c(nc2ccc(Br)cc2c1C(=O)NC[C@@H](CCC(O)=O)c1ccccc1Cl)N1CCCC1 |
| P136 | Cc1c(nc2ccc(Br)cc2c1C(=O)NCC(CCC(O)=O)c1c(Cl)ccc(Cl)c1Cl)N1CCCC(F)(F)C1 |

**Table S2.** Correlation plot showing Inter correlation among the descriptors.

|  | FNSA-2 | WV.mass |
| --- | --- | --- |
| FNSA-2 | **1.0000** |  |
| WV.mass | -0.5009 | **1.0000** |

**Table S3.** Predicting capability of the model.

| **Compound** | **FNSA-2** | **WV.mass** | **Actual pIC50** | **Predicted pIC50** | | **Binding Energy (kcal/mol)** |
| --- | --- | --- | --- | --- | --- | --- |
| **MLR** | **ANN** |
| P3 | -1.093761226 | 466.0459928 | 9.2076 | 9.0150 | 9.134166 | -10.83 |
| P8 | -1.289875215 | 483.6443439 | 9.1024 | 8.9735 | 8.95946 | -9.65 |
| P9 | -0.941801377 | 440.8019842 | 9.0809 | 8.9955 | 9.110247 | -11.59 |
| P10 | -1.000300907 | 474.8909539 | 9.0757 | 9.1116 | 9.388171 | -12.43 |
| P11 | -1.268224374 | 486.4081662 | 9.0706 | 8.9991 | 8.996106 | -10.65 |
| P13 | -1.251181191 | 431.2045232 | 8.9586 | 8.7635 | 8.816758 | -10.08 |
| P18 | -1.351835612 | 490.7503393 | 8.8539 | 8.9673 | 8.922818 | -9.81 |
| P20 | -0.893970711 | 403.5977236 | 8.8539 | 8.8589 | 8.870273 | -11.29 |
| P21 | -0.812127576 | 369.1126695 | 8.8539 | 8.7553 | 8.828000 | -10.08 |
| P22* | -1.177004265 | 390.0600205 | 8.8239 | 8.6255 | 8.598856 | -11.45 |
| P23* | -1.20006543 | 390.5418833 | 8.8239 | 8.6136 | 8.603560 | -10.52 |
| P24 | -1.24433874 | 447.7893047 | 8.7959 | 8.8416 | 8.882089 | -10.37 |
| P26 | -1.153354576 | 430.8595705 | 8.7959 | 8.8218 | 8.751764 | -10.60 |
| P27 | -1.275169355 | 455.8909449 | 8.7696 | 8.8588 | 8.898611 | -9.61 |
| P28 | -1.461569905 | 454.5207114 | 8.7696 | 8.7387 | 8.767857 | -9.68 |
| P29 | -1.190765937 | 398.3589492 | 8.7696 | 8.6541 | 8.623892 | -11.34 |
| P30* | -1.009717859 | 437.5845905 | 8.7447 | 8.9396 | 8.856750 | -11.21 |
| P34 | -1.19474898 | 388.5519883 | 8.6576 | 8.6080 | 8.597840 | -11.55 |
| P37 | -1.147905307 | 425.7529167 | 8.6383 | 8.8024 | 8.715576 | -10.27 |
| P38 | -1.305532191 | 380.4872362 | 8.6198 | 8.5043 | 8.497436 | -9.55 |
| P39 | -1.188670281 | 365.2730822 | 8.6198 | 8.5079 | 8.543291 | -9.86 |
| P40 | -1.357287308 | 396.1555578 | 8.6021 | 8.5424 | 8.585701 | -10.18 |
| P43 | -1.120263031 | 394.9823862 | 8.5850 | 8.6822 | 8.582583 | -11.81 |
| P48 | -1.139924452 | 383.7015121 | 8.5528 | 8.6199 | 8.574855 | -10.22 |
| P49* | -1.288558338 | 374.782219 | 8.5376 | 8.4892 | 8.476587 | -10.67 |
| P50* | -1.221047154 | 395.4994553 | 8.5376 | 8.6228 | 8.622611 | -10.63 |
| P51 | -1.278914128 | 396.2643524 | 8.5376 | 8.5909 | 8.633924 | -8.12 |
| P53 | -1.171120006 | 393.1069977 | 8.5229 | 8.6427 | 8.604127 | -9.72 |
| P54 | -1.282724216 | 392.2670612 | 8.5229 | 8.5707 | 8.606561 | -10.55 |
| P62 | -1.037759835 | 293.1599556 | 8.4949 | 8.2789 | 8.313978 | -11.29 |
| P63 | -1.149504802 | 326.4239944 | 8.4815 | 8.3588 | 8.441147 | -10.99 |
| P67 | -1.20084904 | 312.8005781 | 8.4202 | 8.2667 | 8.258354 | -9.83 |
| P71* | -0.956451929 | 292.9381378 | 8.3979 | 8.3276 | 8.271011 | -12.05 |
| P75 | -1.030556155 | 290.9164702 | 8.3872 | 8.2733 | 8.302343 | -10.76 |
| P76 | -1.071743288 | 288.4980653 | 8.3665 | 8.2373 | 8.30468 | -12.07 |
| P79 | -0.866302184 | 312.2077148 | 8.3468 | 8.4686 | 8.315915 | -10.79 |
| P82* | -0.967528189 | 311.8649 | 8.3279 | 8.4052 | 8.295174 | -11.35 |
| P83 | -0.950561985 | 269.4200154 | 8.3098 | 8.2264 | 8.235284 | -11.14 |
| P84 | -1.608742901 | 402.3371364 | 8.3098 | 8.4162 | 8.297123 | -9.81 |
| P86 | -1.22358509 | 348.3130716 | 8.2840 | 8.4110 | 8.432605 | -11.54 |
| P87 | -1.277298748 | 284.6712429 | 8.2757 | 8.0946 | 8.043711 | -9.84 |
| P88 | -0.956734155 | 295.5433274 | 8.2757 | 8.3391 | 8.274075 | -10.79 |
| P89* | -0.907824495 | 275.4206809 | 8.2757 | 8.2793 | 8.254304 | -10.10 |
| P90 | -0.951518061 | 275.3156307 | 8.2676 | 8.2521 | 8.246003 | -11.00 |
| P92 | -0.946018155 | 271.8296685 | 8.2518 | 8.2400 | 8.241018 | -11.30 |
| P94* | -1.048608527 | 302.1807046 | 8.2366 | 8.3125 | 8.349448 | -11.21 |
| P95 | -1.141258974 | 287.9637263 | 8.2147 | 8.1925 | 8.225118 | -10.92 |
| P98 | -1.004057097 | 259.4315125 | 8.1938 | 8.1492 | 8.174846 | -12.29 |
| P99 | -1.200350531 | 294.9664349 | 8.1938 | 8.1875 | 8.154387 | -10.12 |
| P100 | -1.087821216 | 290.7514952 | 8.1871 | 8.2376 | 8.311175 | -11.16 |
| P101 | -1.020503872 | 289.0435336 | 8.1805 | 8.2711 | 8.290839 | -10.89 |
| P102 | -0.960001084 | 225.4055513 | 8.1805 | 8.0245 | 8.063005 | -11.85 |
| P103 | -0.914044276 | 262.5898194 | 8.1805 | 8.2183 | 8.237408 | -11.64 |
| P104 | -1.205720956 | 305.780399 | 8.1805 | 8.2324 | 8.202967 | -11.87 |
| P106 | -1.153615043 | 249.3103523 | 8.1549 | 8.0127 | 8.061519 | -10.62 |
| P107 | -1.203736849 | 287.2440067 | 8.1487 | 8.1510 | 8.114839 | -10.73 |
| P108 | -0.77195456 | 275.5836452 | 8.1487 | 8.3631 | 8.314827 | -11.01 |
| P109 | -0.993181655 | 276.7251125 | 8.1427 | 8.2329 | 8.246725 | -11.26 |
| P111 | -0.925413461 | 299.5132431 | 8.1249 | 8.3759 | 8.275596 | -10.28 |
| P112* | -0.962969559 | 256.2498565 | 8.1079 | 8.1602 | 8.193182 | -10.23 |
| P113 | -1.136107738 | 276.2691692 | 8.1079 | 8.1435 | 8.163742 | -11.53 |
| P114 | -1.037563997 | 247.5404471 | 8.1079 | 8.0757 | 8.0837 | -11.17 |
| P116 | -1.254534001 | 246.0736112 | 8.0757 | 7.9365 | 8.054519 | -10.59 |
| P117 | -1.038259938 | 240.2081497 | 8.0757 | 8.0427 | 8.045579 | -11.14 |
| P118* | -1.430161894 | 284.335968 | 8.0706 | 7.9996 | 8.021752 | -9.440 |
| P119 | -1.137785757 | 295.8139121 | 8.0655 | 8.2296 | 8.282284 | -10.85 |
| P120 | -1.059477554 | 246.8985607 | 8.0605 | 8.0595 | 8.070634 | -10.51 |
| P122 | -1.420891716 | 315.6397377 | 8.0410 | 8.1448 | 8.028005 | -10.54 |
| P123 | -1.065614807 | 273.7036687 | 8.0315 | 8.1752 | 8.22324 | -10.26 |
| P124 | -1.313138149 | 299.2411275 | 8.0269 | 8.1376 | 8.04168 | -9.560 |
| P125 | -0.904854153 | 212.3289842 | 8.0269 | 8.0000 | 8.122219 | -11.61 |
| P128 | -1.519990151 | 322.6341677 | 8.0223 | 8.1153 | 8.07369 | -10.03 |
| P130* | -0.959072161 | 216.5824496 | 8.0132 | 7.9858 | 8.027516 | -10.95 |
| P131 | -1.297645439 | 248.2613617 | 8.0088 | 7.9199 | 8.052354 | -10.02 |
| P133 | -1.141999364 | 277.1807916 | 8.0044 | 8.1440 | 8.160203 | -10.23 |
| P135 | -0.946001952 | 218.5351590 | 8.0000 | 8.0025 | 8.059788 | -10.98 |
| P136 | -1.400156611 | 304.8889248 | 8.0000 | 8.1096 | 8.022396 | -11.55 |
| *Predicted compounds | | | | | | |

**Table S4.** pIC50 values of designed compounds predicted by the best model equation and their binding energies

| **Compound** | **FNSA-2** | **WV.mass** | **Predicted pIC50 (nM)** | | **Binding Energy (kcal/mol)** |
| --- | --- | --- | --- | --- | --- |
| **MLR** | **ANN** |
| P10af | -1.2192 | 440.7754 | 8.845146111 | 8.849258538 | -10.94 |
| P10ai | -0.93176 | 501.7573 | 9.295335793 | 9.680514129 | -13.21 |
| P10bc | -0.98456 | 409.1279 | 8.846218992 | 8.623016391 | -12.31 |
| P10bh | -1.00309 | 424.1284 | 8.902391159 | 8.723383384 | -13.22 |
| P10bj | -1.05531 | 445.6104 | 8.967125525 | 8.884579411 | -10.65 |
| P10bs | -0.75363 | 367.6237 | 8.800664493 | 9.068374529 | -13.20 |
| P10bv | -1.13827 | 442.1241 | 8.900703416 | 8.832800781 | -12.64 |
| P10cm | -0.98772 | 422.4636 | 8.904296182 | 8.741999614 | -11.25 |
| P10ct | -1.06724 | 417.432 | 8.833026584 | 8.626171682 | -12.84 |
| P10dd | -1.14364 | 433.1255 | 8.856927930 | 8.762173879 | -11.84 |
| P10ez | -1.1666 | 439.3852 | 8.871059601 | 8.820359062 | -10.87 |
| P10ff | -1.03232 | 424.7502 | 8.887311717 | 8.686336309 | -11.20 |
| P10r | -1.1823 | 465.6107 | 8.979471188 | 9.008881883 | -11.29 |
| P10w | -0.90609 | 370.2442 | 8.719227196 | 8.505922497 | -11.47 |
| P9b | -1.05457 | 399.2919 | 8.759141370 | 8.534101973 | -11.82 |
| P9bq | -1.1071 | 409.4255 | 8.772621943 | 8.613207520 | -10.94 |
| P9q | -1.08142 | 430.0888 | 8.881313318 | 8.715844936 | -12.78 |
| P9r | -1.02687 | 385.2083 | 8.712707755 | 8.464640490 | -12.20 |
| P9s | -1.11193 | 407.4276 | 8.760676784 | 8.609677800 | -11.03 |
| P9x | -0.9513 | 601.5272 | 9.732349409 | 9.902472241 | -13.54 |
| P3aa | -1.21981 | 436.3761 | 8.824980048 | 8.826671411 | -6.80 |
| P3ad | -1.27199 | 415.903 | 8.700938803 | 8.752123096 | -10.54 |
| P3ba | -1.28229 | 459.7245 | 8.891840077 | 8.904661064 | -11.94 |
| P3bb | -1.26525 | 445.0463 | 8.836207445 | 8.871583960 | -11.86 |
| P3bc | -1.21902 | 465.0159 | 8.954340026 | 8.964634810 | -12.34 |
| P3bs | -1.11374 | 494.9644 | 9.153485301 | 9.484249625 | -12.66 |
| P3bt | -1.4864 | 504.934 | 8.970466744 | 8.869290037 | -11.69 |
| P3s | -1.32809 | 479.5948 | 8.953247448 | 8.917996540 | -11.64 |

**Table S5.** Designed compounds having binding energies and various type of interaction with the receptor.

| **Compounds** | **Binding Energy (kcal/mol)** | **H-Bond interaction** |
| --- | --- | --- |
| P3bs | -12.66 | Asp50 (2 Å), Tyr55 (2.1 Å), His117 (2 Å) |
| P9q | -12.78 | Gln222 (1.9 Å), Asp224, Tyr319 (2.6 Å) |
| P9x | -13.54 | Gln190 (2.5 Å), Gln222 (1.8 Å), Asp224 (2 Å) |
| P10bh | -13.22 | Tyr24 (1.7 Å), Tyr55 (2.1 Å) |
| P10bs | -13.20 | − |
| P10ct | -12.84 | Ser166 (2.3 Å), Gln190 (2.2 Å) |
| P10ai | -13.21 | Gln190 (2.1 Å) |

**Table S6.** ADME and toxicity properties of the designed molecules.

| **Compound** | **Absorption** | **Distribution** | | **Metabolism** | | **Excretion** | **Toxicity** |
| --- | --- | --- | --- | --- | --- | --- | --- |
| **Human Intestinal absorption (%)** | **BBB permeability (log BB)** | **CNS permeability (log PS)** | **CYP3A4 substrate** | **CYP1A2 inhibitor** | **Total clearance (log mL/min/kg)** | **Maximum tolerated dose (log mg/kg/day)** |
| P3bs | 86.522 | -0.345 | -1.392 | Yes | No | -0.058 | -0.122 |
| P9q | 80.772 | -1.287 | -1.695 | Yes | No | -0.167 | -0.021 |
| P9x | 91.272 | -0.236 | -1.443 | Yes | No | -0.113 | 0.112 |
| P10bs | 89.228 | -0.131 | -1.438 | Yes | No | -0.178 | -0.170 |
| P10ct | 89.144 | -0.465 | -1.789 | Yes | No | -0.008 | 0.014 |
| P10ai | 89.044 | -0.157 | -1.464 | Yes | No | -0.181 | -0.167 |
| P10bh | 91.443 | -0.217 | -1.445 | Yes | No | -0.168 | 0.108 |

**Table S7.** Calculated energy values of designed derivatives using restricted B3LYP/6-311++G(d,p) basis set.

| **Compound** | **EHOMO (eV)** | **ELUMO (eV)** | **ΔEHL (eV)** | **Dipole Moment (Debye)** | **I (eV)** | **A (eV)** | **µ (eV)** | **ƞ (eV)** | **S (eV-1)** | **σ (eV)** | **ω (eV)** |
| --- | --- | --- | --- | --- | --- | --- | --- | --- | --- | --- | --- |
| P3bs | -6.16 | -1.99 | 4.17 | 8.32 | 6.16 | 1.99 | -4.07 | 2.09 | 0.48 | 4.07 | 3.97 |
| P9q | -5.77 | -1.69 | 4.08 | 7.49 | 5.77 | 1.69 | -3.73 | 2.04 | 0.49 | 3.73 | 3.40 |
| P9x | -5.68 | -1.63 | 4.05 | 8.45 | 5.68 | 1.63 | -3.65 | 2.02 | 0.49 | 3.65 | 3.30 |
| P10bs | -5.83 | -1.80 | 4.03 | 6.03 | 5.83 | 1.80 | -3.81 | 2.01 | 0.50 | 3.81 | 3.61 |
| P10ct | -6.12 | -2.02 | 4.10 | 6.35 | 6.12 | 2.02 | -4.07 | 2.05 | 0.49 | 4.07 | 4.04 |
| P10ai | -6.04 | -1.85 | 4.20 | 9.91 | 6.04 | 1.85 | -3.94 | 2.10 | 0.48 | 3.94 | 3.71 |
| P10bh | -5.78 | -1.72 | 4.06 | 10.73 | 5.78 | 1.72 | -3.75 | 2.03 | 0.49 | 3.75 | 3.46 |

**Figure S1.** Scatterplot of the biological activities (pIC50) with their molecular descriptors. The orange circles represent the training set compounds and the green circles represent the prediction set.


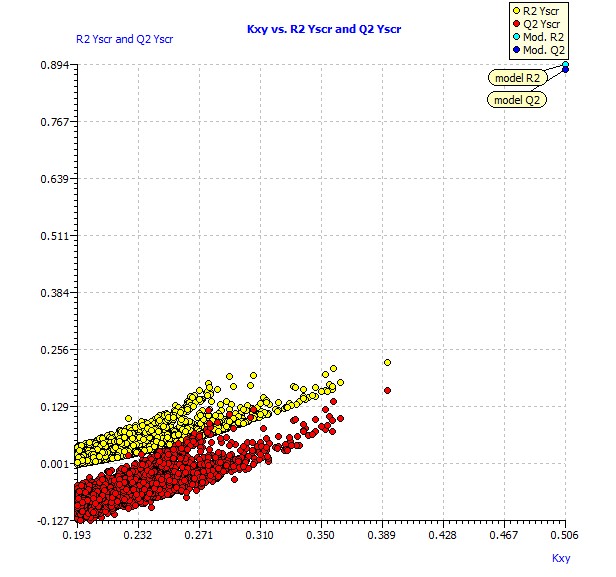


**Figure S2.** Y-scrambling graph in the internal validation.


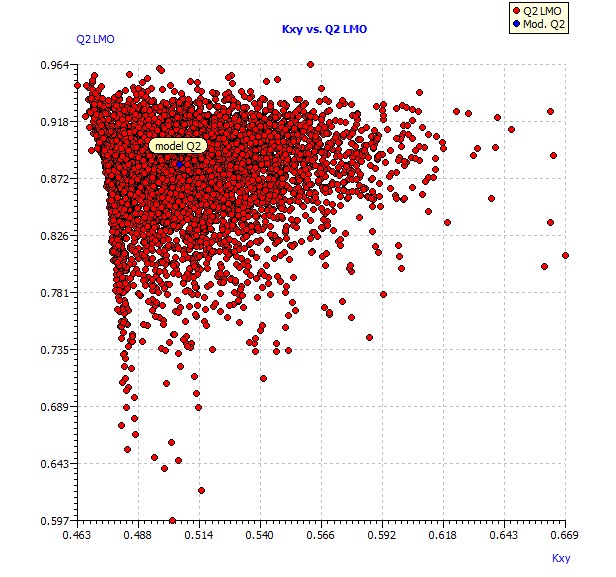


**Figure S3.** LMO scatter plot.

**Figure S4.** Applicability domain. Hat diagonal values versus standardized residuals. The orange circles represent the training set compounds and the green circles represent the prediction set.


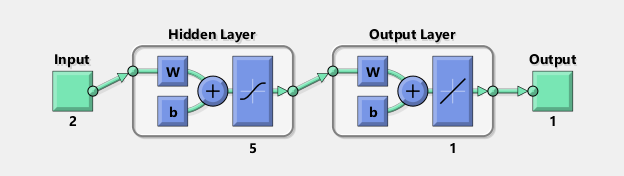


**Figure S5.** Artificial neural network diagram for prediction of pIC50.


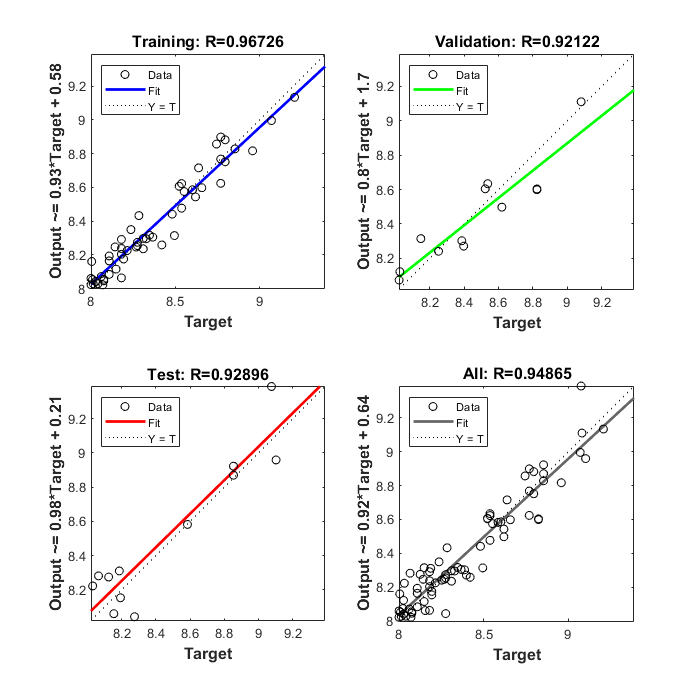


**Figure S6.** Correlation coefficient between the experimental and estimated pIC50 in training, validation, testing and all data samples.


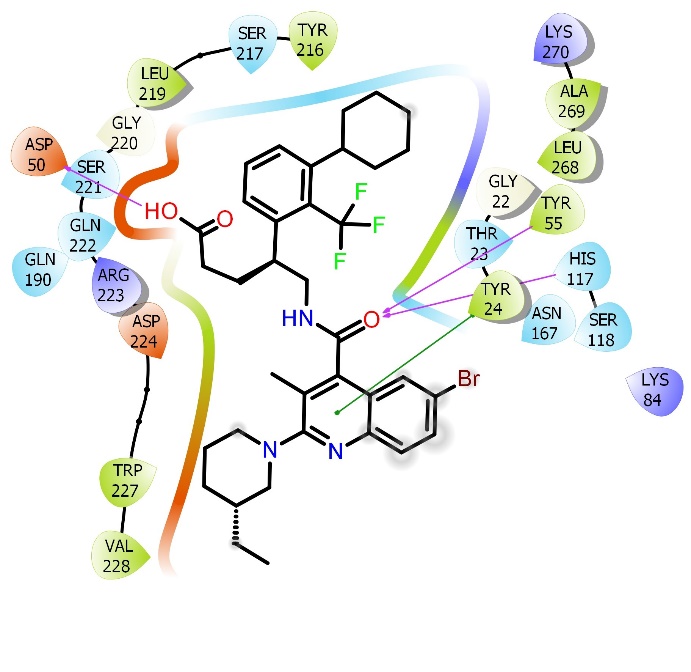

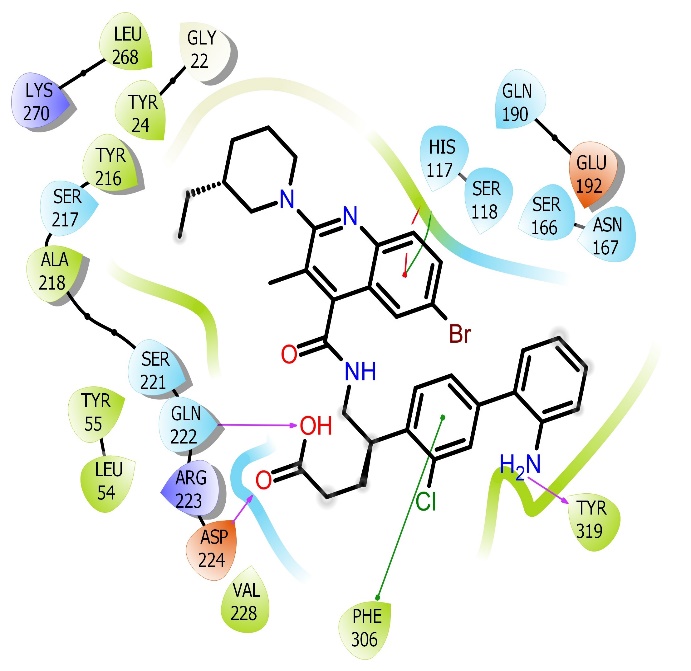

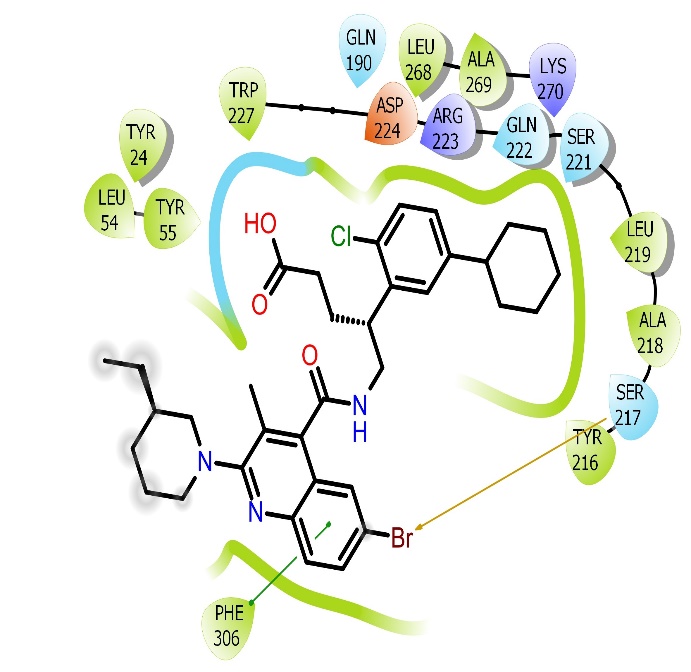

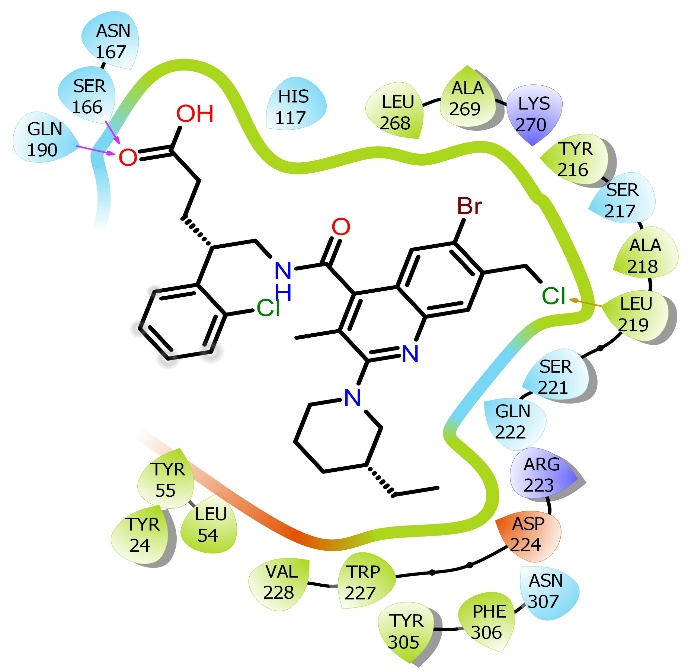

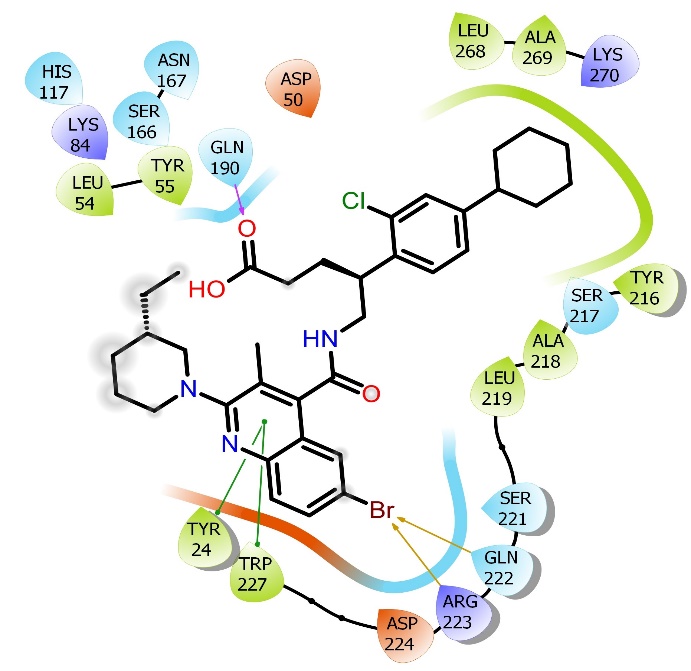

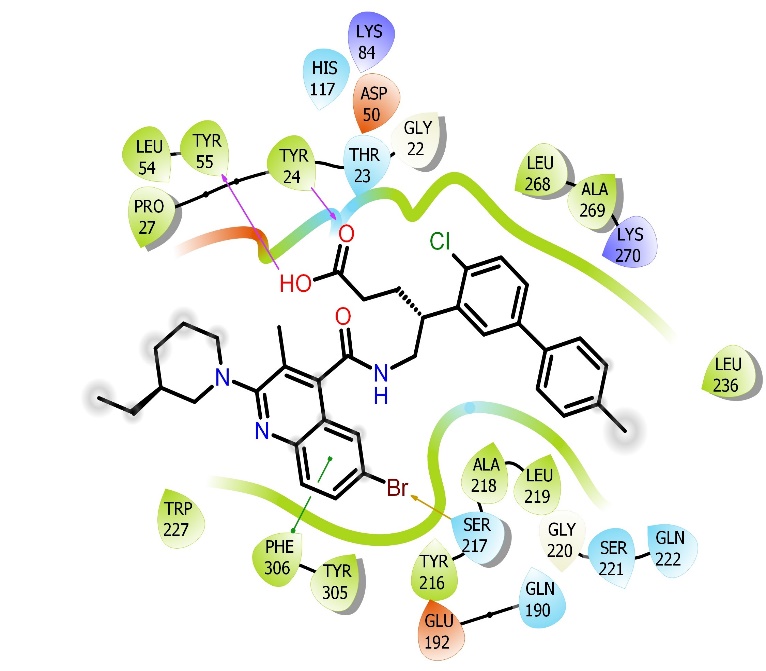

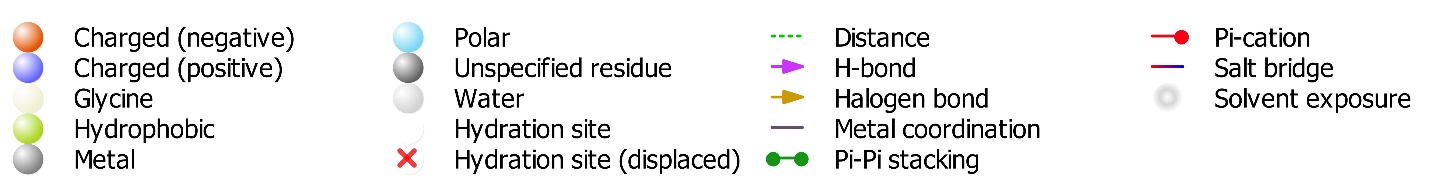


**P10ct**

**P10bs**

**P3bs**

**P9q**

**P10bh**

**P10ai**

**Figure S7.** Molecular docking interactions of designed compounds with the target receptor of prostaglandin F synthase (PDB ID: 2F38)


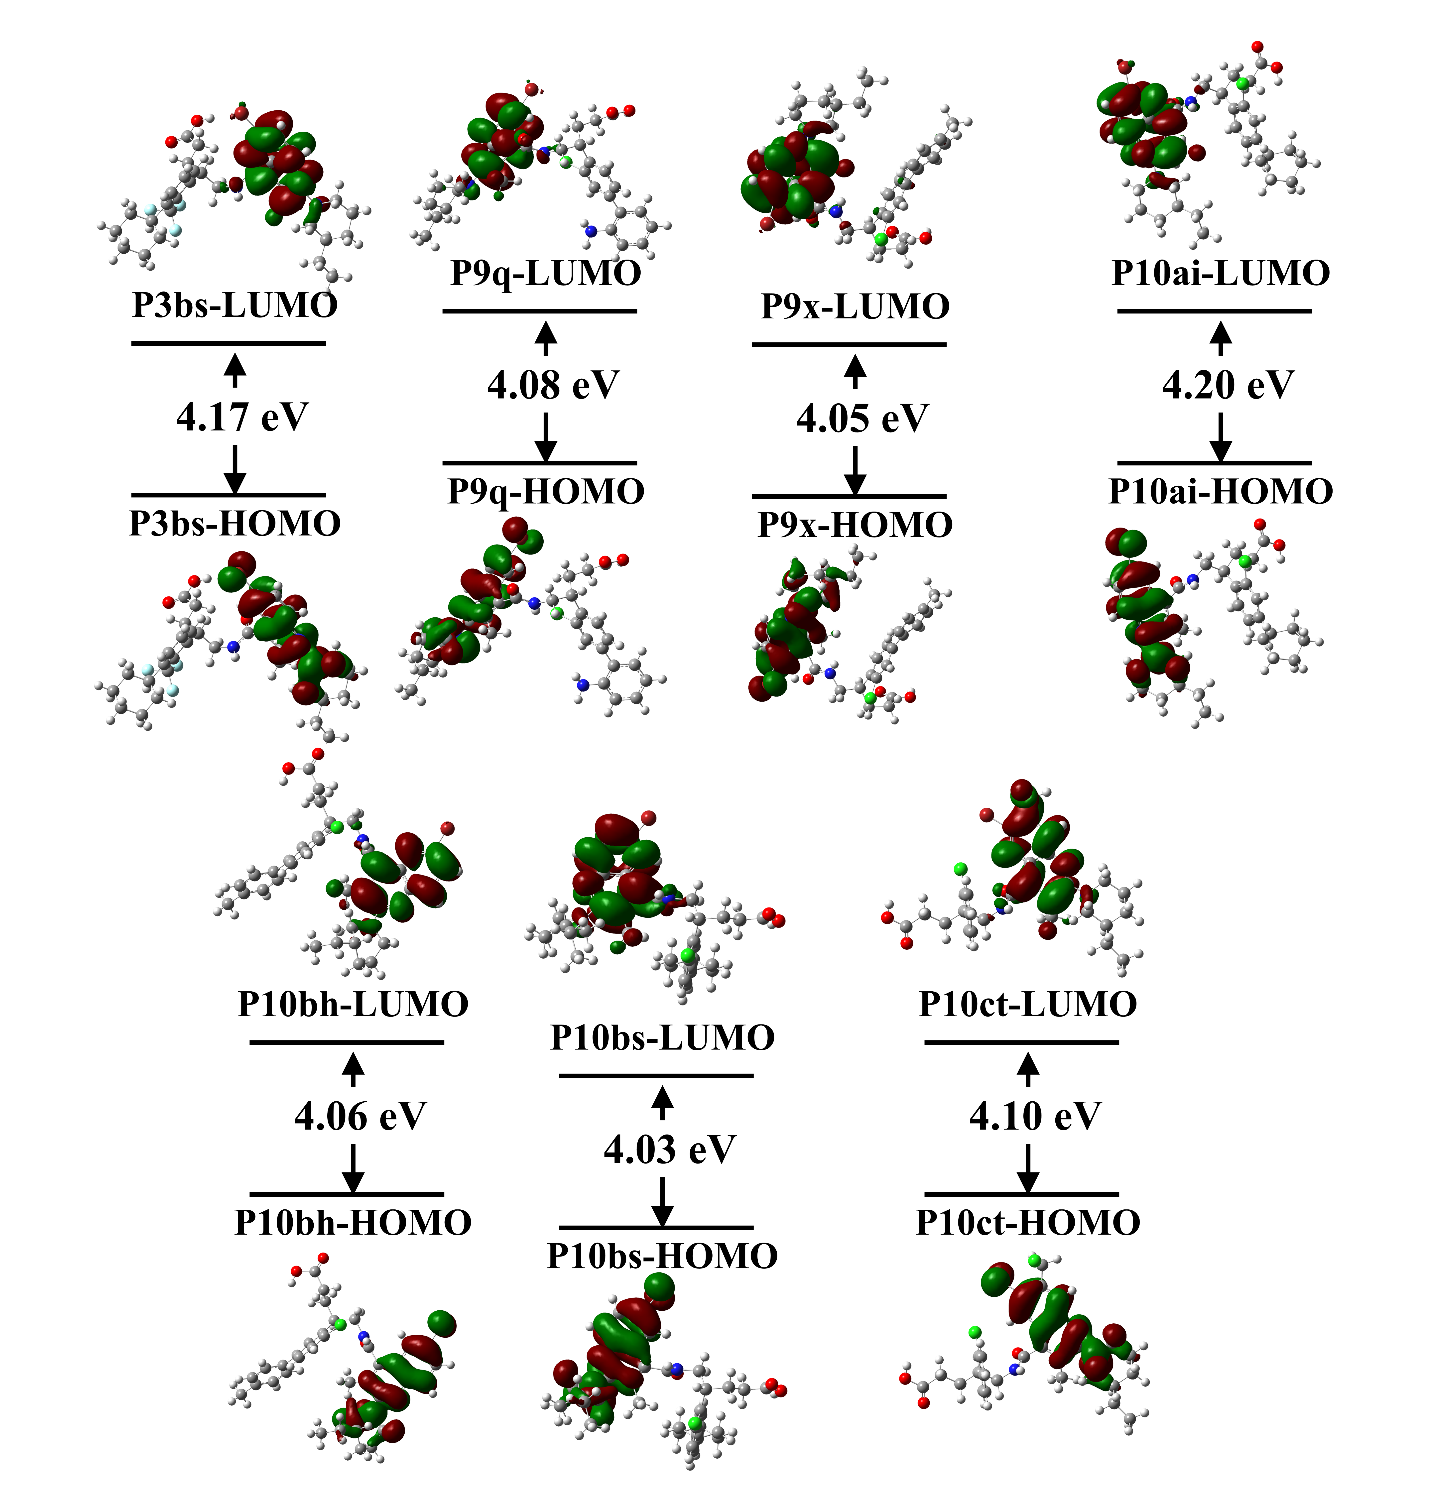


**Figure S8.** Frontier molecular orbital maps of the designed compounds.

| 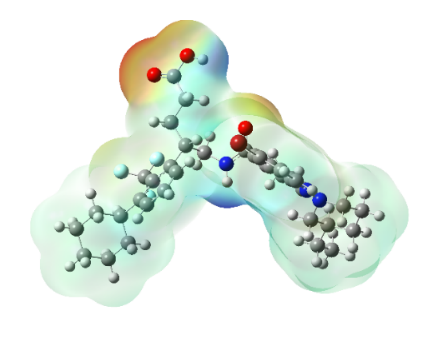 | 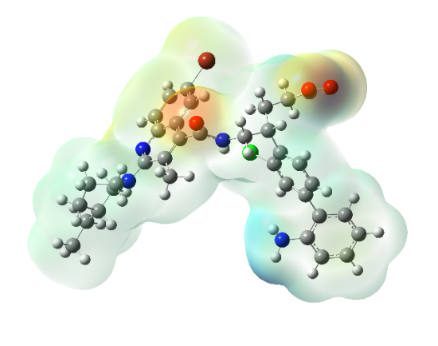 |
| --- | --- |
| **MEP-P3bs** | **MEP-P9q** |
| 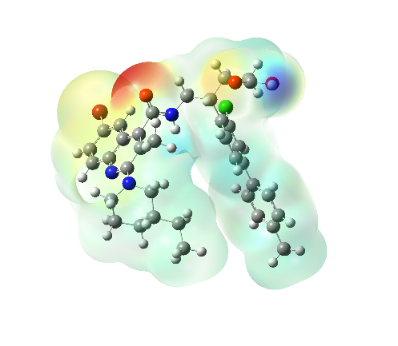 | 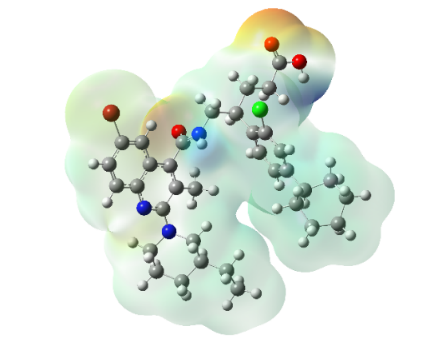 |
| **MEP-P9x** | **MEP-P10ai** |
| 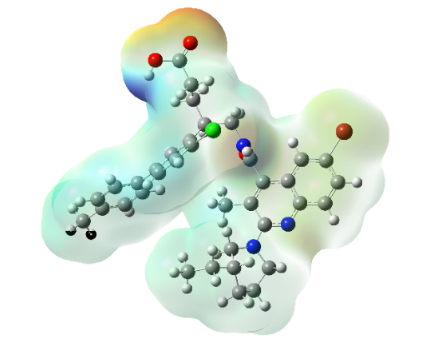 | 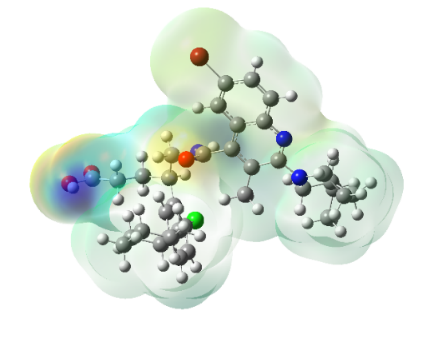 |
| **MEP-P10bh** | **MEP-P10bs** |
| 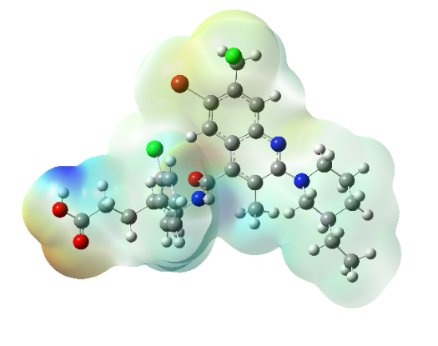 |  |
| **MEP-P10ct** |  |

**Figure S9.** MEP maps of the designed compounds

**Figure S10.** Best designed compounds with PGF2α inhibitory activity.
